# Supplementary material for: Advanced genetic therapies for the treatment of Rett syndrome: state of the art and future perspectives
Source: Front Neurosci. 2023 May 25;17:1172805. doi: 10.3389/fnins.2023.1172805 (PMC10248472; doi:10.3389/fnins.2023.1172805)
Supplement: Supplementary file 1 [file Table_1.XLSX]

## Sheet: Table 1
	Gadalla et al., 2013	Gadalla et al., 2013	Garg et al., 2013	Garg et al., 2013	Matagne et al., 2017	Gadalla et al., 2017	Gadalla et al., 2017	Sinnet et al, 2017	Luoni et al., 2017	Luoni et al., 2017	Tillotson et al., 2017	Matagne et al., 2021	Sinnet et al., 2021	Yank et al., 2022	Yank et al., 2022
Gene delivery	CNS injection	Systemic injection (tail vein)	Systemic injection (tail vein)	Systemic injection (tail vein)	Systemic injection (tail vein)	Systemic injection (tail vein)	Cerebroventricular injection	Intracisterna magna injection	Systemic injection (tail vein)	Systemic injection (tail vein)	Intracranial injection	Systemic injection (tail vein)	Intrathecal injection	Cerebroventricular injection	Cerebroventricular injection
AAV seriotype Promoter	AAV9/MECP2(e1) b-chicken promoter	scAAV9-MECP2 short promoter (229bp) of the endogenous Mecp2	scAAV9/Mecp2 (e1) 730 bp of the endogenous Mecp2 promoter	scAAV9/Mecp2 (e1) 730 bp of the endogenous Mecp2 promoter	scAAV9-MCO (codon optimezed of Mecp2e1) 264bp of the endogenous Mecp2 promoter	scAAV9-MECP2 426bp of MECP2 promoter, modified 3' UTR with pA and miRNA binding sites for the regulation of MeCP2	scAAV9-MECP2 426bp of MECP2 promoter, modified 3' UTR with pA and miRNA binding sites for the regulation of MeCP2	scAAV9-MECP2 426bp of MECP2 promoter, modified 3' UTR with pA and miRNA binding sites for the regulation of MeCP2	PHP.eB-iMecp2	PHP.eB-iMecp2	scAAV9/DNIC 426bp of Mecp2 promoter driving the human DNIC cDNA	scAAV9-MCO (codon optimezed of Mecp2e1) 264bp of the endogenous Mecp2 promoter	scAAV9/miniMECP2-miRARE	AAV9/hSyn-MECP2	AAV9/CAG-MECP2
Mouse model Sex Age	Mecp2tm1.1Bird/J Males Neonatal (P0-P3 days)	Mecp2tm1.1Bird/J Males Juvenile (4-5 weeks)	Mecp2tm1.1Bird/J Males Juvenile (4-5 weeks)	Mecp2tm1.1Bird/J Het females (10-12 months)	Mecp2tm1.1Bird/J Males Juvenile (4 weeks)	Mecp2tm1.1Bird/J Males Juvenile (4-5 weeks)	Mecp2tm1.1Bird/J Males Neonatal (P0-P3 days)	Mecp2tm1.1Bird/J Males Juvenile (4-5 weeks)	Mecp2tm1.1Bird/J Males Juvenile (4-5 weeks)	Mecp2tm1.1Bird/J Het females (5-months)	Mecp2tm1.1Bird/J Males Neonatal (P1-P2 days)	Mecp2tm1.1Bird/J Het females (5-months)	Mecp2tm1.1Bird/J Males Juvenile (4-5 weeks)	MeCP2-/y (CRISPR/Cas9) Males Neonatal (P2 days)	MeCP2-/y (CRISPR/Cas9) Males Neonatal (P2 days)
Beneficial effects	Survival, severity score, open field, treadmill	Survival; the other parameters were not investigated	Survival, severity score	Severity score, rotarod, inverted grid, platform and nesting ability	Rotarod, open field, weight, survival, breathing patterns	Survival and body weight	Survival and severity score	Survival, body weight, severity score.	Survival, severity score, rotarod, open field, elevated plus maze, beam balance test	Body weight, severity score, open field and beam balance test	Severity score and survival	Apnea and overall breathing patterns, open field	Survival, weight and delayed of severe gait abnormality	Survival	Survival, partial rescue of weight (at P45), abnomal locomotor and gait score.
Side effects or not recovering	Body weight and respiratory function not revovered	Liver damage	NA	Effect on respiration were incoclusive	Anxiety-relate behavior not rescued	No liver damage	No liver damage	No hepatic toxicity	Tail lesion solved with cyclosporine administration	NA	No deleterious effects	Rotarod not recovered, Liver damage	Tail lesions	No liver toxicity	No liver toxicity
